# Supplementary material
Source: PubMed Central journal article supplement (PMC4223478)
Supplement: supp_M114.040774_mcp.M114.040774-6.pdf [file supp_M114.040774_mcp.M114.040774-6.pdf]

## Supplemental Figure Legend

**Figure S1. *DSC* homolog mRNA expression in wild-type and mutant strains.** cDNA synthesized from total RNA (1  $\mu$ g) was quantified by real-time PCR. mRNA expression was normalized to *ACT1* and shown as fold change relative to wild-type cells. Data are the average of three biological replicates and error bars show standard error among biological replicates
