# Supplementary material
Source: PubMed Central journal article supplement (PMC4223478)

Figure S1

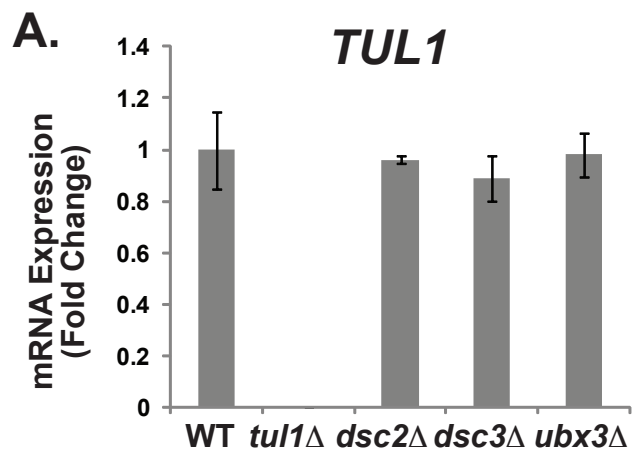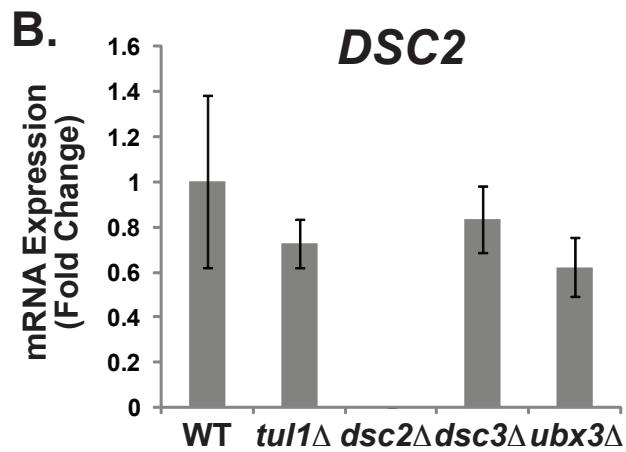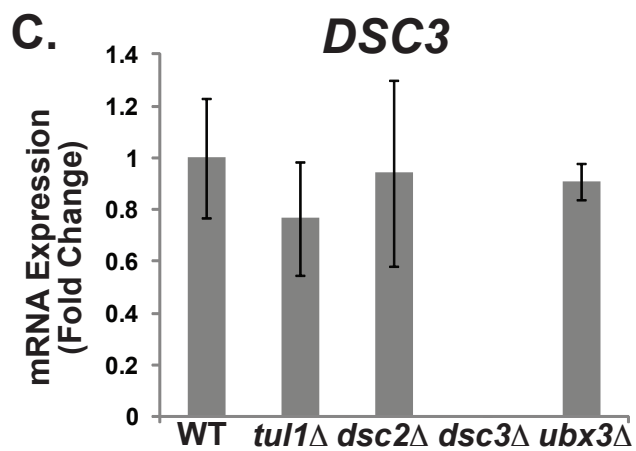

Supplement: supp_M114.040774_mcp.M114.040774-1.pdf [file supp_M114.040774_mcp.M114.040774-1.pdf]
